# Supplementary material for: National Survey of the JBDS-IP/UK SACT board guidelines on the management of glycaemia
Source: Research Square preprint supplement (doi:10.21203/rs.3.rs-8652042/v1), 2026-02-24
Supplement: Supplementary file 1 [file 94349fd02d7d0066c2fc2ee8.docx]

**Appendix 1: Table of Inter-rater Variability for Institutions with Multiple Responses.**

|  |  | **Percentage agreement** | | | | | | | |
| --- | --- | --- | --- | --- | --- | --- | --- | --- | --- |
|  | **Nb of respondents (n≥4)** | 9 | 7 | 7 | 7 | 5 | 4 | 4 | 4 |
|  | **Institution** | B | C | D | E1 | E2 | F | G | H |
| **Question** |  |  |  |  |  |  |  |  |  |
| Awareness of the JBDS-IP/UK Chemotherapy Board Guidelines on the management of glycaemia in cancer patients? | Yes | 11 | 29 | 57 | 57 | 80 | 100 | 75 | 25 |
| No | 78 | 57 | 29 | 43 | 0 | 0 | 25 | 50 |
| Missing | 11 | 14 | 14 | 0 | 20 | 0 | 0 | 25 |
| **Question** |  |  |  |  |  |  |  |  |  |
| Implementation i.e. established pathway to monitor plasma glucose whilst on steroids/SACT & initiate glucose lowering treatment | Yes -Full | 0 | 14 | 43 | 0 | 0 | 0 | 0 | 0 |
| Yes- Partial | 11 | 0 | 0 | 29 | 20 | 0 | 0 | 25 |
| No | 33 | 0 | 0 | 29 | 20 | 75 | 100 | 50 |
| Don’t know | 44 | 71 | 43 | 43 | 40 | 25 | 0 | 0 |
| Missing | 11 | 14 | 14 | 0 | 20 | 0 | 0 | 25 |
| **Question** |  |  |  |  |  |  |  |  |  |
| Does your hospital supply individuals at high risk of diabetes during SACT with the following? | Test strips | 0 | 0 | 0 | 0 | 0 | 0 | 0 | 0 |
| Meters | 0 | 14 | 0 | 0 | 0 | 0 | 0 | 0 |
| Both | 0 | 0 | 0 | 0 | 0 | 0 | 0 | 0 |
| GP letter | 0 | 0 | 14 | 0 | 0 | 0 | 0 | 0 |
| None | 29 | 0 | 0 | 43 | 20 | 75 | 25 | 25 |
| Missing | 78 | 71 | 71 | 43 | 80 | 25 | 75 | 75 |
| Other | 0 | 14 | 14 | 14 | 0 | 0 | 0 | 0 |
| **Question** |  |  |  |  |  |  |  |  |  |
| How important do you think it is to implement the JBDS-IP/UK SACT board guidelines? | Extremely important | 29 | 0 | 14 | 57 | 0 | 50 | 0 | 29 |
| Very important | 0 | 14 | 0 | 0 | 20 | 25 | 0 | 0 |
| Moderately important | 0 | 14 | 14 | 0 | 0 | 0 | 25 | 25 |
| Slightly important | 0 | 0 | 0 | 0 | 0 | 0 | 0 | 0 |
| Not at all | 0 | 0 | 0 | 0 | 0 | 0 | 0 | 0 |
| Missing | 78 | 71 | 71 | 43 | 80 | 25 | 75 | 75 |

Appendix 2: Survey of JBDS-IP/ UK SACT Board guidelines on the management of glycaemia

Thank you for taking this survey which will take 5-10 minutes to complete.

 Systemic anti-cancer therapy (SACT), especially when glucocorticoids are used, can worsen hyperglycaemia in individuals with and without diabetes and this poses many challenges to diabetes management guidelines on the management of glycaemic control in people with cancer, recommend self-monitoring of capillary blood glucose during anti-cancer therapy in people with diabetes or at risk of hyperglycaemia. These guidelines also recommend that glucose management takes place in primary care. However, implementation of these guidelines poses a challenge at many hospitals in the UK, leading to inequity in care.

 This questionnaire was developed to fully understand the challenges cancer hospitals face implementing these guidelines. We will use these results to develop initiatives that improve patient pathways for managing glycaemia in people with cancer and education to reduce variability in diabetes care.

End of Block: Default Question Block

Start of Block: Information about you

Information about you

What is your profession?

- Doctor (1)
- Allied Health Professional (AHP), please specify (2) __________________________________________________
- Pharmacist (3)
- Nurse (4)
- Other, please specify (5) __________________________________________________

What region is your hospital located in?

- Scotland (1)
- Wales (2)
- Northern Ireland (3)
- East of England (4)
- London (5)
- Midlands (6)
- North East and Yorkshire (7)
- North West of England (8)
- South East of England (9)
- South West of England (10)

What is your hospital's postcode?

________________________________________________________________

Is your place of work a:

- Tertiary Centre (1)
- District General hospital (2)
- Private Hospital (3)
- Other, please specify (4) __________________________________________________

End of Block: Information about you

Start of Block: Block 2

The following questions refer to the JBDS-IP/UK chemotherapy board guidelines

1. Are you aware of the JBDS-IP/UK Chemotherapy Board Guidelines on the management of glycaemia in cancer patients?

- Yes (1)
- No (2)

1. Have these guidelines been implemented in your setting?

- Implemented fully .i.e . established a pathway to monitor plasma glucose whilst on steroids/SACT & initiate glucose lowering treatment (1)
- Implemented with amendments (2)
- Not implemented (3)
- Don’t know (4)

Display This Question:

If Have these guidelines been implemented in your setting? = Implemented with amendments

If implemented with amendments:

- Plasma and/or capillary blood monitoring in patents on steroids/SACT with pre-existing diabetes (1)
- Plasma and/or capillary blood monitoring in patients on steroids/SACT with symptoms of hyperglycaemia without underlying diabetes (2)
- Other amendment(s) please list below (3) __________________________________________________

| Page Break |  |
| --- | --- |

1. The guidelines state that plasma glucose should be checked in patients with diabetes or at increased risk of hyperglycaemia before starting and during SACT /steroids along with prompt initiation/titration of antidiabetic therapy to manage hyperglycaemia.Who at your organisation is responsible for:

Monitoring plasma glucose in haematology &/or oncology clinics

- Oncology doctor (1)
- Non-Medical Prescriber (pharmacist, nurse, AHP) (2)
- Pharmacist (3)
- Chemotherapy Nurse (5)
- Clinical Nurse Specialist (4)
- Diabetic specialist nurse (10)
- Shared MDT responsibility, please specify (6) __________________________________________________
- Primary Care Provider (7)
- Patient (11)
- Other (8) __________________________________________________
- Not implemented (9)

Initiating glucose lowering treatment

- Oncology doctor (1)
- Non-Medical Prescriber (pharmacist, nurse, AHP) (2)
- Pharmacist (3)
- Chemotherapy Nurse (5)
- Primary Care Provider (7)
- Other (8) __________________________________________________
- Not implemented (9)

| Page Break |  |
| --- | --- |

1. Does your hospital supply individuals at high risk of diabetes during SACT with the following?

- Blood glucose testing meters (1)
- Blood glucose testing meters and test strips (2)
- Test strips (3)
- GP for letter them to initiate glucose monitoring (6)
- None of the above (4)
- Other (5) __________________________________________________
